# Supplementary material
Source: PubMed Central journal article supplement (PMC3402036)

Supplemental Figure 1

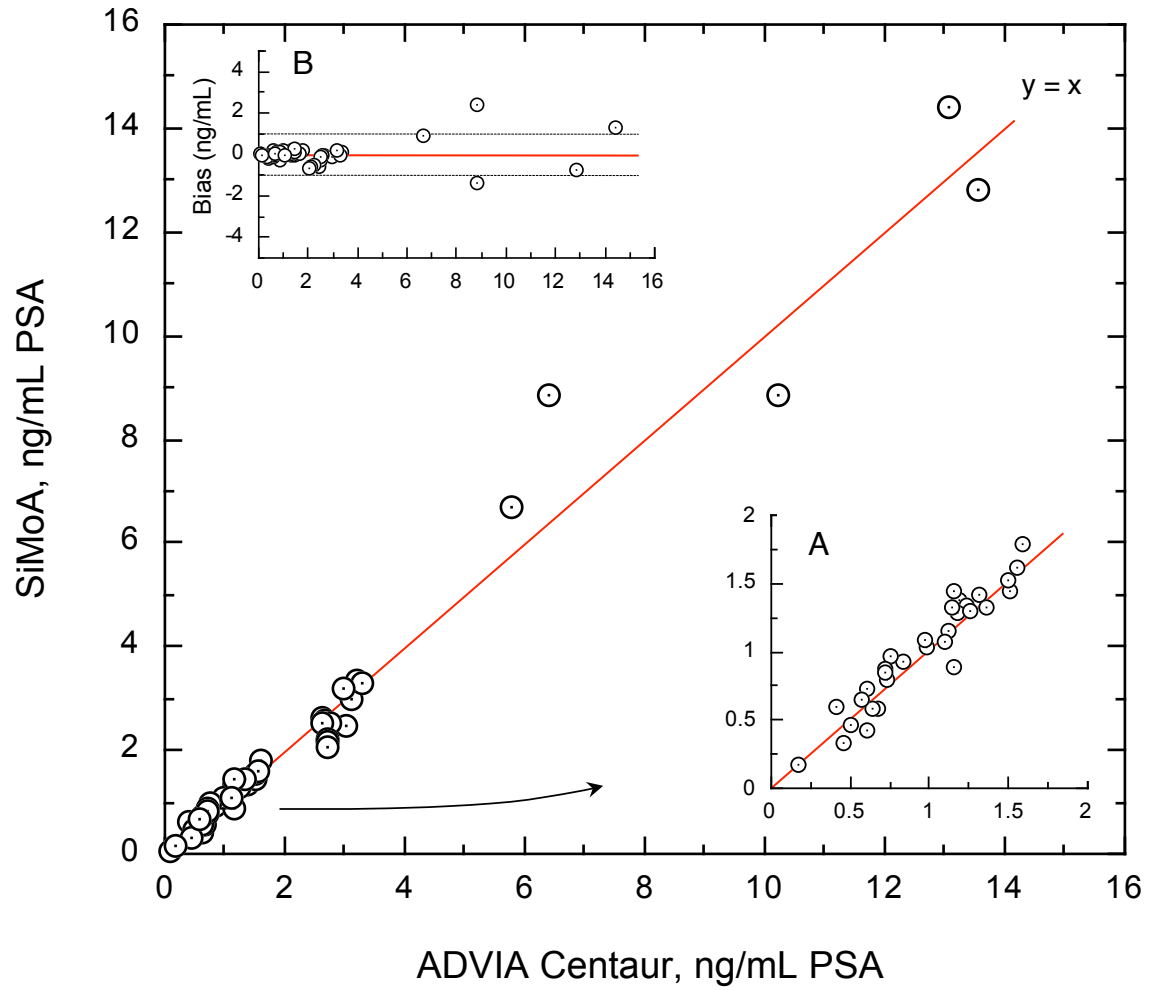

Supplement: NIHMS346806-supplement-Figure_1.pdf [file NIHMS346806-supplement-Figure_1.pdf]

# Supplemental Figure 2

## Five Year Survival

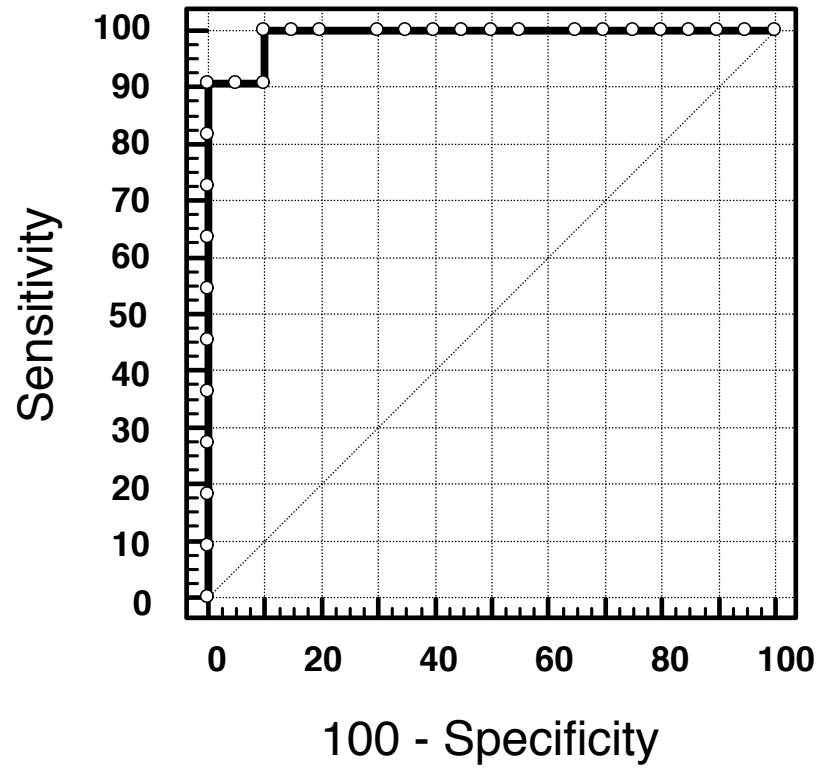

Supplement: NIHMS346806-supplement-Figure_2.pdf [file NIHMS346806-supplement-Figure_2.pdf]
